# Supplementary material
Source: PubMed Central journal article supplement (PMC3276149)
Supplement: supp_1.5.369_000570.pdf [file supp_1.5.369_000570.pdf]

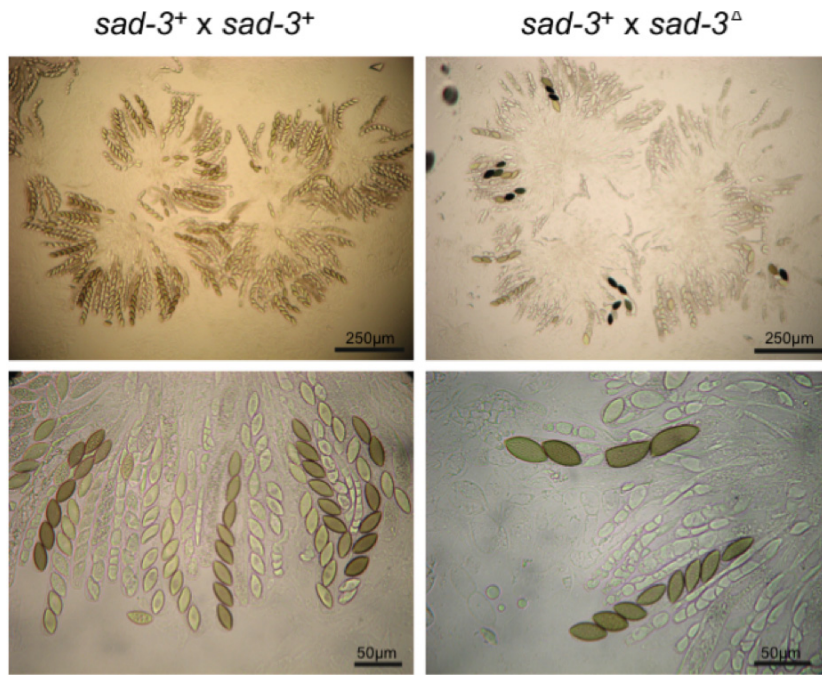

**Figure S1** Independent deletion of *sad-3*<sup>+</sup> results in strains (P16-27 and P16-28) that produce a low number of ascospores and occasional four-spored asci in heterozygous crosses. Strains used in the above crosses include F2-23, P8-42, and P16-27.

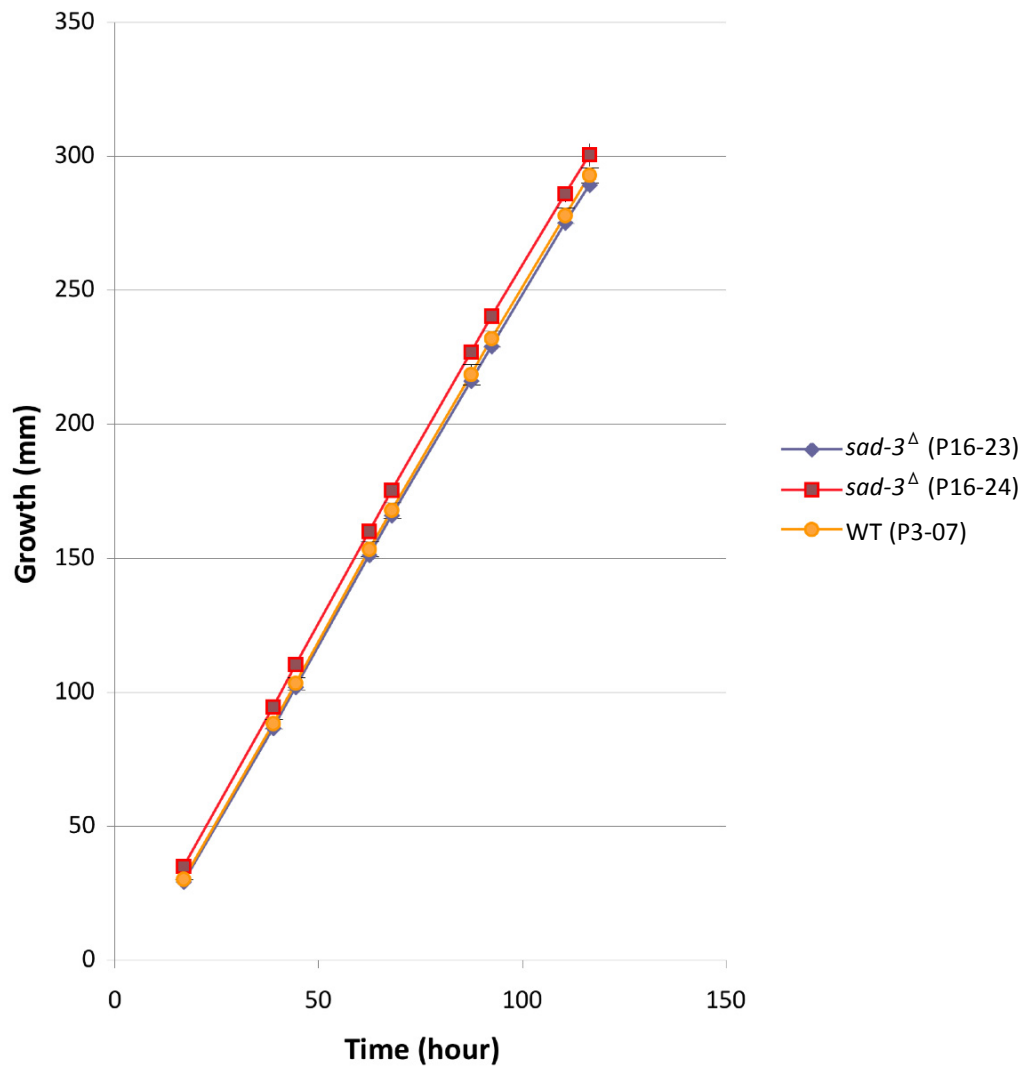

**Figure S2** Linear growth of *sad-3*<sup>Δ</sup> is normal. Race tube assays were performed on two *sad-3*<sup>Δ</sup> strains and a wild-type (WT) control, essentially according to the method described by D. D. Perkins (<http://www.fgsc.net/neurosporaprotocols/How%20to%20measure%20and%20monitor%20line%20final.pdf>). Three race tubes were used per strain, with the position of leading hyphae marked twice daily starting at 17 hours post-inoculation.

**Table S1 Primers designed for this study**

| Primer           | Sequence (5' to 3')                               | Amplification of                             |
|------------------|---------------------------------------------------|----------------------------------------------|
| NCU09211-101191R | CTCAGCTCAAACATTGGTGATTC                           | KO (knockout) vector                         |
| NCU09211-A       | CGCTCGGCAAGGGTTCTACATA                            | C-terminal GFP tag (left flank)              |
| NCU09211-GFP1    | CAGCGCCTGCACCAGCTCCTGCCCTTCGGGTTCCCAAAGTCAATCAAC  | C-terminal GFP tag (left flank)              |
| NCU09211-GFP2    | CTCCTTCAATATCAGTTAACAAAGGGCTGGACATTAGAGGCGGCAAAG  | C-terminal GFP tag (right flank)             |
| NCU09211-B       | TGTGGCGATGCTAACGGACTACTG                          | C-terminal GFP tag (right flank), KO vector  |
| NCU09211-C       | GGTCAACCGAGAACTTGGGCTTC                           | C-terminal GFP tag (nested primer)           |
| NCU09211-D       | GGAATGGAAGGTGGCCGAGAA                             | C-terminal GFP tag (nested primer)           |
| NCU09211-E       | ATACTTGAGGGTCGGCTCGGATG                           | N-terminal GFP and YFPN tags (left flank)    |
| NCU09211-NGFP1   | GCAGCCTGAATGGCGAATGGACGCGCCGCTGAGAGGATGAGGAAATGGA | N-terminal GFP and YFPN tags (left flank)    |
| NCU09211-NGFP2   | CAGGAGCGGGTGCGGGTGTGGAGCGATGGCCAACCGCAGAGTGGATTC  | N-terminal GFP and YFPN tags (right flank)   |
| NCU09211-F       | CGGTCATCCTCCAGTTCCTGA                             | N-terminal GFP and YFPN tags (right flank)   |
| NCU09211-G       | CCCGTCCAAACTCAGCTCAAAC                            | N-terminal GFP and YFPN tags (nested primer) |
| NCU09211-H       | CACATTGAACTCGCGCAGGGATT                           | N-terminal GFP and YFPN tags (nested primer) |
