# Supplementary material
Source: PubMed Central journal article supplement (PMC3276149)
Supplement: supp_1.5.369_FigureS1.pdf [file supp_1.5.369_FigureS1.pdf]

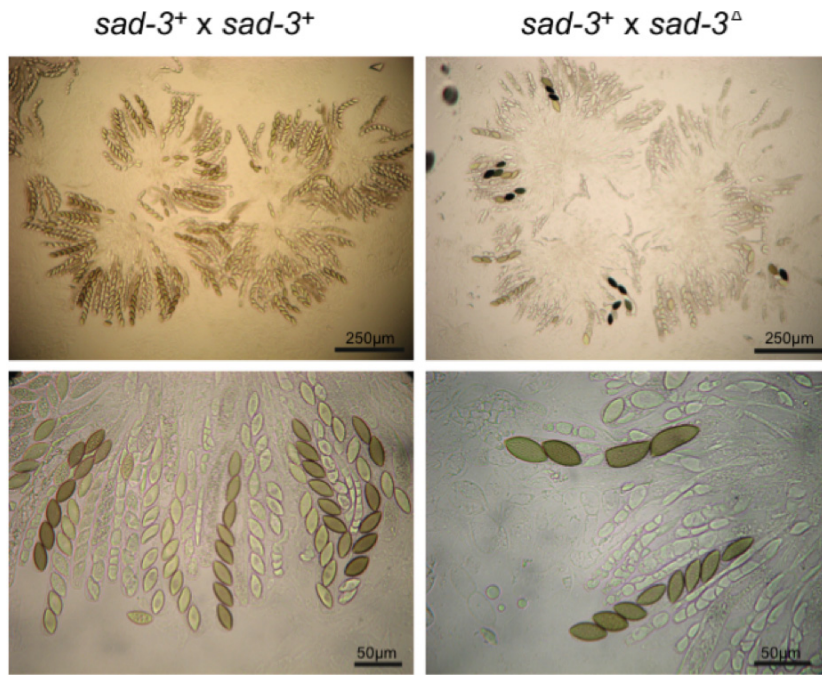

**Figure S1** Independent deletion of *sad-3*<sup>+</sup> results in strains (P16-27 and P16-28) that produce a low number of ascospores and occasional four-spored asci in heterozygous crosses. Strains used in the above crosses include F2-23, P8-42, and P16-27.
