# Supplementary material
Source: PubMed Central journal article supplement (PMC3276149)
Supplement: supp_1.5.369_FigureS2.pdf [file supp_1.5.369_FigureS2.pdf]

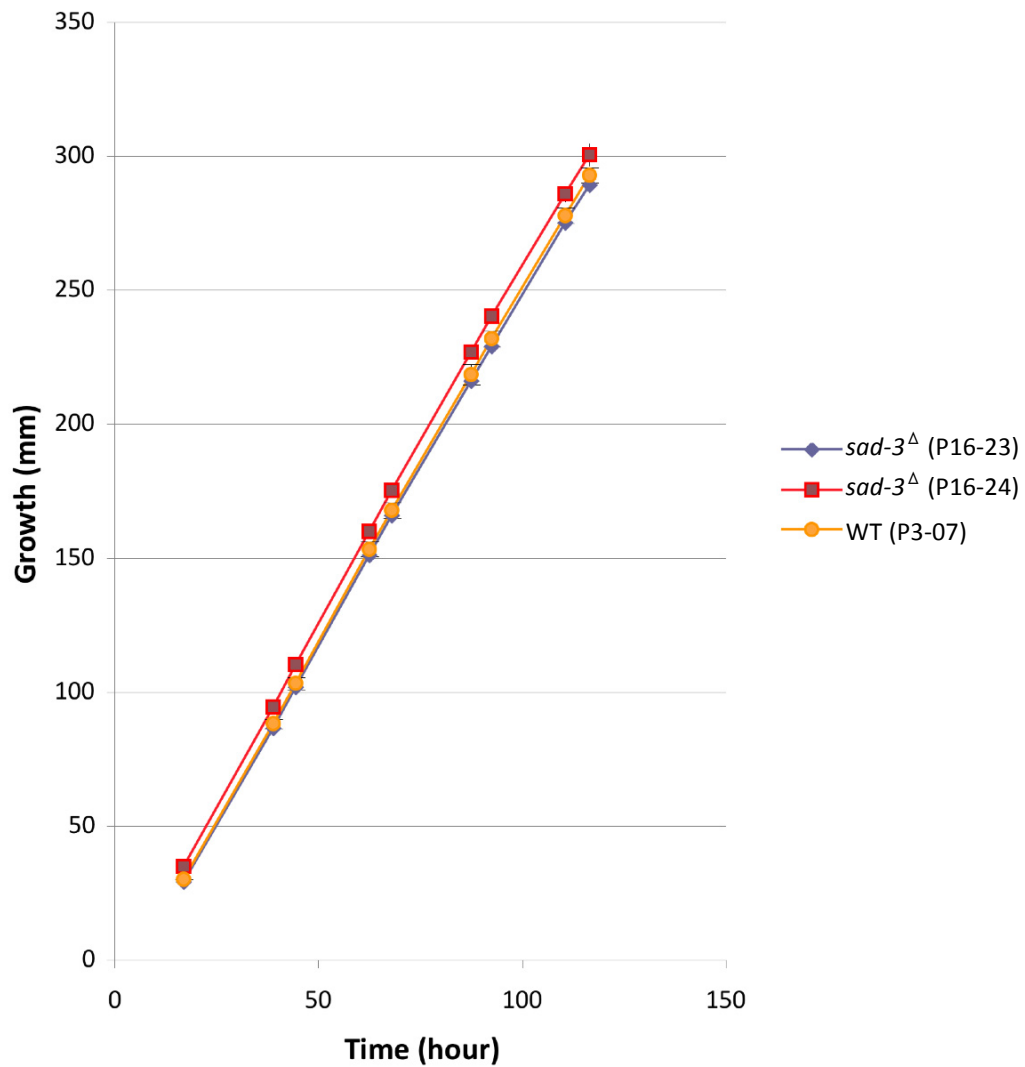

**Figure S2** Linear growth of *sad-3*<sup>Δ</sup> is normal. Race tube assays were performed on two *sad-3*<sup>Δ</sup> strains and a wild-type (WT) control, essentially according to the method described by D. D. Perkins (<http://www.fgsc.net/neurosporaprotocols/How%20to%20measure%20and%20monitor%20line%20final.pdf>). Three race tubes were used per strain, with the position of leading hyphae marked twice daily starting at 17 hours post-inoculation.
