# Supplementary material
Source: PubMed Central journal article supplement (PMC3276149)
Supplement: supp_1.5.369_TableS1.pdf [file supp_1.5.369_TableS1.pdf]

**Table S1 Primers designed for this study**

| Primer           | Sequence (5' to 3')                               | Amplification of                             |
|------------------|---------------------------------------------------|----------------------------------------------|
| NCU09211-101191R | CTCAGCTCAAACATTGGTGATTC                           | KO (knockout) vector                         |
| NCU09211-A       | CGCTCGGCAAGGGTTCTACATA                            | C-terminal GFP tag (left flank)              |
| NCU09211-GFP1    | CAGCGCTGCACCAGCTCCTGCCCTTCGGGTTCCCAAAGTCAATCAAC   | C-terminal GFP tag (left flank)              |
| NCU09211-GFP2    | CTCCTTCAATATCAGTTAACAAAGGGCTGGACATTCAAGGGCGGCAAAG | C-terminal GFP tag (right flank)             |
| NCU09211-B       | TGTGGCGATGCTAACGGACTACTG                          | C-terminal GFP tag (right flank), KO vector  |
| NCU09211-C       | GGTCAACCGAGAACTTGGGCTTC                           | C-terminal GFP tag (nested primer)           |
| NCU09211-D       | GGAATGGAAGGTGGCCGAGAA                             | C-terminal GFP tag (nested primer)           |
| NCU09211-E       | ATACTTGAGGGTCGGCTCGGATG                           | N-terminal GFP and YFPN tags (left flank)    |
| NCU09211-NGFP1   | GCAGCCTGAATGGCGAATGGACGCGCCGCTGAGAGGATGAGGAAATGGA | N-terminal GFP and YFPN tags (left flank)    |
| NCU09211-NGFP2   | CAGGAGCGGGTGCGGGTGTGGAGCGATGGCCAACCGCAGAGTGGATTC  | N-terminal GFP and YFPN tags (right flank)   |
| NCU09211-F       | CGGTCATCCTCCAGTTCCTGA                             | N-terminal GFP and YFPN tags (right flank)   |
| NCU09211-G       | CCCGTCCAACTCAGCTCAAAC                             | N-terminal GFP and YFPN tags (nested primer) |
| NCU09211-H       | CACATTGAACTCGCGCAGGGATT                           | N-terminal GFP and YFPN tags (nested primer) |
